# Supplementary material
Source: Copernicus journal article supplement (doi:10.5194/egusphere-2026-2647)
Supplement: Supplementary file 1 [file egusphere-2026-2647-supplement.pdf]

1 **S1. Measurement results of gas species, VOCs, and meteorology.**

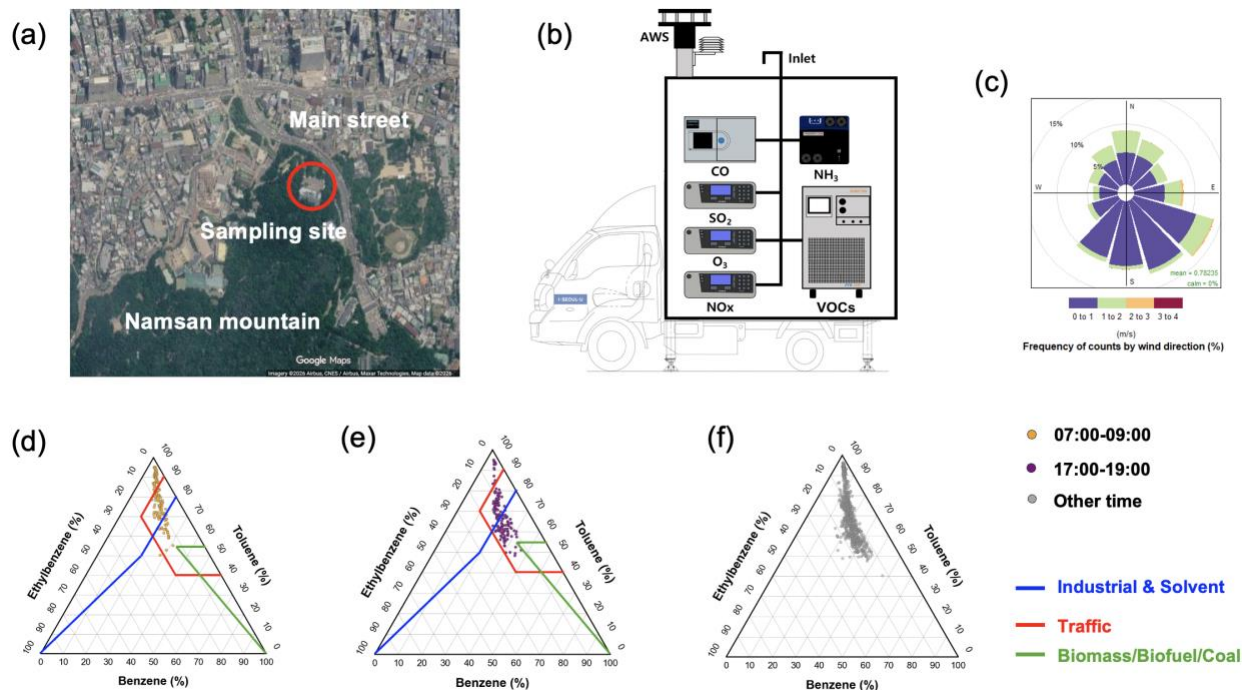

2  
3 **Figure S1: Overview of the sampling campaign setup. (a)** Satellite map showing the location of the sampling  
4 **site (red circle) in Seoul, situated between a main street and Namsan Mountain. (b)** Schematic diagram of the  
5 **mobile laboratory equipped with instruments for measuring trace gases (CO, SO<sub>2</sub>, O<sub>3</sub>, NO<sub>x</sub>, NH<sub>3</sub>) and VOCs,**  
6 **along with an automatic weather station (AWS). (c)** Wind rose diagram depicting the frequency of wind speed  
7 **and direction during the observation period. (d-f)** Ternary diagram for morning rush hour, afternoon rush  
8 **hour and other periods. Satellite imagery and map data in panel (a):** Google Maps; Imagery ©2026 Airbus,  
9 **CNES / Airbus, Maxar Technologies; Map data ©2026 Google.**

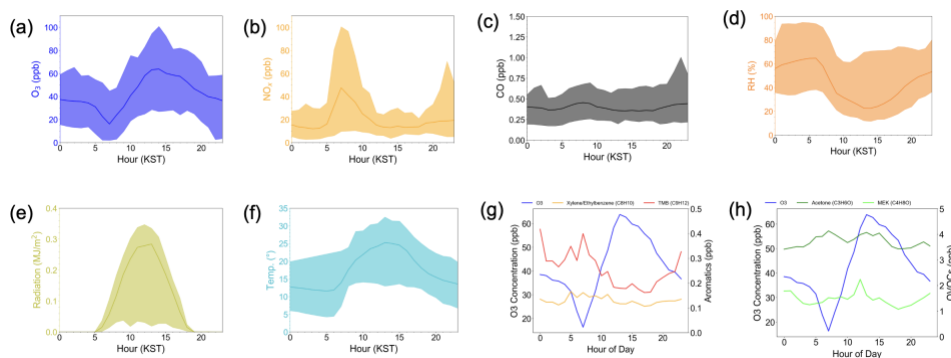

11  
12 **Figure S2: Diurnal variations of (a) ozone, (b) NO<sub>x</sub>, (c) CO, (d) RH, (e) solar radiation, and (f) temperature.**  
13 **Panels (g) and (h) compare the diurnal profiles of ozone (left axis) with representative VOC species (right axis):**  
14 **(g) aromatics (Xylenes/Ethylbenzene and TMB) and (h) OVOCs (Acetone and MEK). Solid lines represent**  
15 **hourly averages, while shaded areas indicate the range (minimum to maximum values).**

17  
18  
19  
20  
21  
22

**Table S1: Average concentrations of the top 20 VOCs measured by PTR-MS. Species were selected based on their overall average mixing ratios and are grouped by chemical category. Daytime (06:00-19:00) and nighttime (19:00-06:00) periods are distinguished based on the presence of solar radiation.**

| Formula<br>(PTR-MS)                          | VOCs                          | Concentration (ppb) |                 |                   |
|----------------------------------------------|-------------------------------|---------------------|-----------------|-------------------|
|                                              |                               | Overall average     | Daytime average | Nighttime average |
| <b>OVOCs</b>                                 |                               |                     |                 |                   |
| CH <sub>2</sub> O                            | Formaldehyde                  | 1.07 ± 0.53         | 1.07 ± 0.56     | 1.08 ± 0.50       |
| CH <sub>4</sub> O                            | Methanol                      | 4.66 ± 2.11         | 4.42 ± 1.90     | 4.94 ± 2.29       |
| CH <sub>2</sub> O <sub>2</sub>               | Formic acid                   | 0.91 ± 0.30         | 0.96 ± 0.32     | 0.85 ± 0.27       |
| C <sub>2</sub> H <sub>4</sub> O              | Acetaldehyde                  | 1.84 ± 0.73         | 1.93 ± 0.75     | 1.75 ± 0.70       |
| C <sub>2</sub> H <sub>4</sub> O <sub>2</sub> | Acetic acid                   | 2.37 ± 1.10         | 2.46 ± 1.10     | 2.28 ± 1.08       |
| C <sub>3</sub> H <sub>4</sub> O              | Acrolein                      | 1.16 ± 0.96         | 1.17 ± 1.05     | 1.14 ± 0.86       |
| C <sub>3</sub> H <sub>6</sub> O              | Acetone                       | 3.71 ± 1.44         | 3.85 ± 1.40     | 3.55 ± 1.47       |
| C <sub>3</sub> H <sub>6</sub> O <sub>2</sub> | Methyl acetate/Propionic acid | 0.52 ± 0.29         | 0.54 ± 0.32     | 0.49 ± 0.26       |
| C <sub>4</sub> H <sub>8</sub> O              | Methyl Ethyl Ketone           | 1.46 ± 1.11         | 1.49 ± 1.07     | 1.43 ± 1.14       |
| <b>Aromatics</b>                             |                               |                     |                 |                   |
| C <sub>6</sub> H <sub>6</sub>                | Benzene                       | 0.67 ± 0.36         | 0.69 ± 0.34     | 0.66 ± 0.38       |
| C <sub>7</sub> H <sub>8</sub>                | Toluene                       | 4.51 ± 6.02         | 4.38 ± 4.88     | 4.66 ± 7.08       |
| C <sub>8</sub> H <sub>8</sub>                | Styrene                       | 0.13 ± 0.08         | 0.13 ± 0.07     | 0.13 ± 0.09       |
| C <sub>8</sub> H <sub>10</sub>               | Xylene / Ethylbenzene         | 1.27 ± 1.03         | 1.29 ± 0.87     | 1.26 ± 1.18       |
| C <sub>10</sub> H <sub>8</sub>               | Naphthalene                   | 0.08 ± 0.03         | 0.08 ± 0.04     | 0.08 ± 0.03       |
| C <sub>9</sub> H <sub>12</sub>               | Trimethylbenzene              | 0.26 ± 0.25         | 0.24 ± 0.20     | 0.29 ± 0.30       |
| <b>Biogenic</b>                              |                               |                     |                 |                   |
| C <sub>5</sub> H <sub>8</sub>                | Isoprene                      | 0.19 ± 0.09         | 0.20 ± 0.09     | 0.18 ± 0.08       |
| C <sub>10</sub> H <sub>16</sub>              | Limonene / $\alpha$ -Pinene   | 0.08 ± 0.04         | 0.08 ± 0.04     | 0.07 ± 0.03       |
| C <sub>15</sub> H <sub>24</sub>              | Sesquiterpenes                | 1.51 ± 0.17         | 1.55 ± 0.21     | 1.46 ± 0.09       |

23  
24  
25  
26  
27  
28

29

## 30 **S2. Details of photochemical clock and MCM-OBM model.**

31

### 32 **Text S1. OFP and OH reactivity**

33 To quantify the theoretical influence of individual VOCs on ozone production, the OFP and OHR were calculated.  
34 OFP is defined as the product of the species concentration and its MIR factor (Carter, 2009), providing a static estimate  
35 of the ultimate ozone-forming capacity under optimum conditions. Complementing this, OHR was calculated by  
36 multiplying the VOC concentration by its reaction rate constant with the hydroxyl radical (Atkinson and Arey, 2003).  
37 Unlike OFP, OHR represents the instantaneous kinetic driver of the oxidation cycles that fuel ozone production (Sinha  
38 et al., 2012).

39

### 40 **Text S2. Observation-Based Model (OBM)**

41 To quantify in situ ozone production dynamics, we simulated the chemical system using an Observation-Based Model  
42 (OBM) utilizing the Master Chemical Mechanism (MCM) via the AtChem2 framework (Sommariva et al., 2020). The  
43 model was constrained by hourly measurements of NO, NO<sub>2</sub>, O<sub>3</sub>, CO, meteorology, and a full suite of measured VOCs  
44 (Zhu et al., 2024). To address instrumental limitations in isomer separation, un-specified C<sub>8</sub>H<sub>10</sub> masses were allocated  
45 to xylenes and ethylbenzene using representative ratios derived from the KORUS-AQ campaign in Seoul (Simpson et  
46 al., 2020). Physical loss processes (dilution and deposition) were parameterized using a first-order loss rate equivalent  
47 to a 12-hour mixing lifetime (1/43200 s<sup>-1</sup>) (Zhu et al., 2024), and unmeasured HONO was constrained to 2% of NO<sub>x</sub>  
48 (Wang et al., 2025).

49 The net ozone production rate (P(O<sub>3</sub>)) was calculated as the difference between the gross production rate and the loss  
50 rate (Gu et al., 2022). To quantify the chemical sensitivity of the system, the Relative Incremental Reactivity (RIR)  
51 was calculated, representing the percentage change in ozone production resulting from a 1% change in a specific  
52 precursor or precursor group, serving as a direct metric of effective control potential (Wang et al., 2025).

53

### 54 **Text S3. OH exposure estimation**

55 To distinguish the extent of chemical processing from physical dilution, we estimated the photochemical age of the  
56 air mass. The time-integrated exposure to OH radicals (OH exposure or [OH]Δt) was quantified using the ratio of  
57 benzene to trimethylbenzene (TMB), as these compounds share common sources but differ significantly in their  
58 reactivity (Borbon et al., 2013; Hayes et al., 2013). The OH exposure was solved using the following equation:

$$59 \quad [OH]\Delta t = \frac{1}{(k_{TMB+OH} - k_{benz+OH})} \times \left( \ln \frac{[benzene]}{[TMB]} \Big|_{t=0} - \ln \frac{[benzene]}{[TMB]} \right) \quad (1)$$

60 where [OH]Δt represents the time integrated OH exposure (molecules cm<sup>-3</sup> s);  $k_{TMB+OH}$  and  $k_{benz+OH}$  are the rate  
61 constants for the reaction of TMB and benzene with OH radicals, respectively;  $[benzene]/[TMB]_{t=0}$  is the initial  
62 emission ratio determined at nighttime when photochemistry is negligible (derived from the regression slope in Fig.  
63 S3); and  $[benzene]/[TMB]$  is the measured concentration ratio at sampling time  $t$ .

64 The rate constant for TMB ( $k = 36.0 \times 10^{-12} \text{ cm}^3 \text{ s}^{-1}$ ) was calculated as the average of its isomers (1,2,3-; 1,2,4-; and  
65 1,3,5-TMB), considering their measured ratio in KORUS-AQ (Simpson et al., 2020), as the PTR-ToF-MS technique  
66 used in this study could not resolve specific isomers.

67

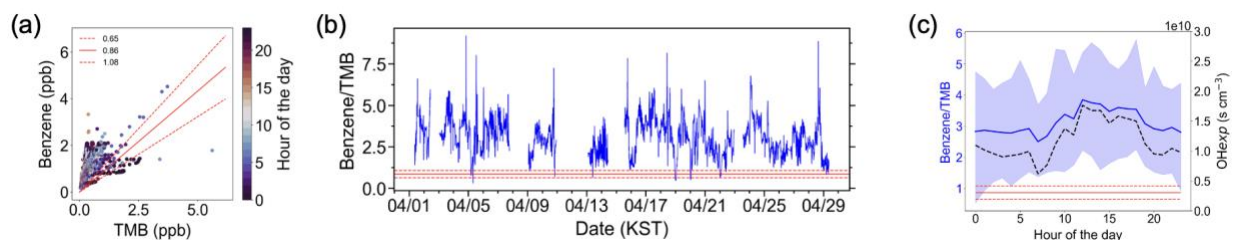

68

69 **Figure S3: Photochemical clock analysis using [benzene]/[TMB].** Panel (a) displays scatter plots of benzene vs  
 70 TMB, colored by hour of the day. Panel (b) shows the time series of estimated OH exposure ( $\text{OH}_{\text{exp}}$ ). Panel (c)  
 71 presents the diurnal variations of VOC ratios (left axis, blue) and corresponding  $\text{OH}_{\text{exp}}$  (right axis, black). Red  
 72 solid lines indicate the estimated emission ratios, and dashed red lines represent their uncertainty bounds.

73

#### 74 Text S4. Verification of Chemical Oxidation versus Physical Dilution

75 To verify that the  $\Delta\text{VOC}$  term represents chemical oxidation rather than physical dilution, we analyzed the timing of  
 76 VOC depletion relative to the photochemical age of the air mass (Fig. S4). Following the morning rush hour,  
 77 observations show a sharp decline in the concentrations of both toluene and TMB. However, the process-informed  
 78 ML model distinguishes the drivers of these losses. Toluene, despite its rapid concentration decay, is assigned a low  
 79 SHAP slope (Fig. 3c), indicating that its depletion is primarily driven by physical dilution (boundary layer expansion)  
 80 rather than ozone-producing oxidation. In contrast, the model assigns high sensitivity to TMB and xylenes. These  
 81 species exhibit depletion rates that exceed physical dilution, coincident with the rise in calculated OH exposure. This  
 82 selective attribution confirms that the model successfully filters out the 'background' signal of physical dispersion.

83

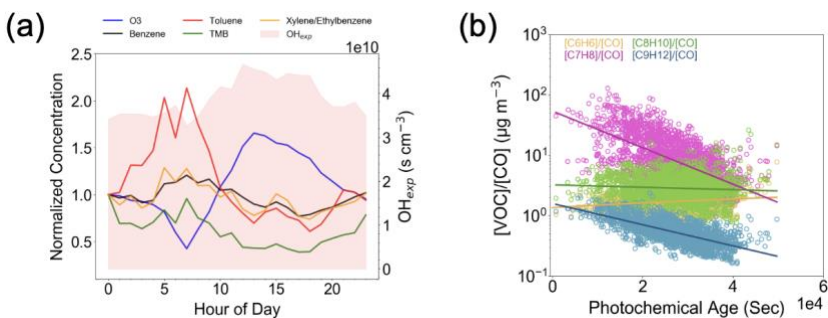

84

85 **Figure S4: Relationship between VOC oxidation and photochemical age.** (a) Diurnal profiles of normalized  $\text{O}_3$ ,  
 86 benzene, toluene, xylene/ethylbenzene, and trimethylbenzene (TMB), shown together with the estimated OH  
 87 exposure (shaded, right axis). (b) VOC-to-CO ratios as a function of photochemical age, illustrating progressive  
 88 depletion of reactive aromatics with increasing oxidative processing.

89



### 112 **S3. Validation, selection of input parameters, and results of the ML model.**

113

#### 114 **Text S5. Evaluation of Feature Selection and Grouping Strategies**

115 Selecting a chemically interpretable subset of input variables from high-dimensional PTR-MS data is critical for  
116 accurate ozone attribution. We found purely statistical feature selection approaches unsuitable for this task, as they  
117 tended to prioritize oxidation coproducts that correlate strongly with atmospheric aging rather than causal precursors  
118 (Guyon et al., 2002). To resolve this, we implemented a knowledge-guided feature curation process. First, the  
119 comprehensive VOC list was filtered against Maximum Incremental Reactivity (MIR) scale, retaining only recognized  
120 ozone precursors (Carter, 2009). This curation retained key primary aromatics, biogenics, and major oxygenated  
121 species including formaldehyde (HCHO). Following this curation, we tested whether reducing dimensionality through  
122 feature engineering could improve robustness. We aggregated the selected VOCs into six physicochemical groups  
123 based on their OH reactivity (kOH, separated by the median into high and low reactivity subsets) and source origin  
124 (primary/biogenic and secondary/mixed). However, comparative evaluation demonstrated that the model utilizing  
125 individual, curated VOCs significantly outperformed the aggregated-group models in predictive accuracy ( $R^2$  value).  
126 This confirms that preserving specific chemical identity is essential for capturing the non-linear sensitivities of ozone  
127 formation. Therefore, the full list of chemically curated individual species was adopted to maximize both model  
128 performance and the granularity of the subsequent SHAP analysis.

#### 129 **Text S6. Details of the ML Training and Validation Process**

130 The predictive performance of the knowledge-informed model was optimized through systematic hyperparameter  
131 tuning and robust cross-validation. Based on the XGBoost framework, the model configuration was finalized with 500  
132 estimators, a learning rate of 0.01, and a maximum tree depth of 6.

133 To ensure the model's generalizability and minimize overfitting, a comprehensive 10-fold cross-validation (CV)  
134 strategy was implemented. The dataset was partitioned into ten subsets; in each iteration, nine subsets (90%) were  
135 used for training, while the remaining subset (10%) served as an independent validation set. This iterative process was  
136 repeated ten times, ensuring that the entire dataset was effectively utilized for both training and validation phases. The  
137 optimized model achieved a mean  $R^2$  of 0.79 across the validation folds, indicating good predictive performance.  
138 Statistical performance metrics and scatter plots are detailed in Fig. S7.

#### 139 **Text S7. Description of SHAP explainer**

140 SHAP has substantially improved researchers' ability to interrogate the internal structure of ML models, which are  
141 often treated as black boxes because their decision-making is not readily interpretable. SHAP assigns an importance  
142 value to each predictor for a given prediction, thereby quantifying individual contributions to the output and clarifying  
143 the model's reasoning. This enables insights that are difficult to obtain with traditional analytical approaches. The  
144 global and local explanations provided by SHAP support two main objectives: (1) quantifying the overall influence of  
145 environmental drivers on ozone formation, and (2) interpreting how specific predictor values shape predictions,  
146 including linear and nonlinear effects of key factors (e.g., RH, temperature, and temporal variability). Computations  
147 were performed using the TreeExplainer in the SHAP package (v0.42) developed by Lundberg et al (Lundberg et al.,  
148 2020). The SHAP output can be expressed in a linear additive form, as shown in Equation (1).

$$149 \quad f(x) = g(x) = \Phi_0 + \sum_{i=1}^M \Phi_i \quad (2)$$

150 where  $f(x)$  is the XGBoost predictive model;  $g(x)$  is the output from the explanation model from the SHAP method;  
151 and  $\Phi_0$  is the expected or base value over the dataset, while  $\Phi_i$  is the SHAP value of the  $i$ th factor, both of which are  
152 generated by the SHAP explanation model.

153 In the context of our models, a positive value ( $\Phi_i > 0$ ) of variable  $i$  signifies a favorable association that elevated the  
 154 prediction above the base value ( $\Phi_0$ ), whereas a negative value ( $\Phi_i < 0$ ) implied a negative influence that reduced the  
 155 prediction below the base value. In the context of atmospheric pollution, the variables were associated with their effect  
 156 on the pollutant concentration of the chemical components.

157

158 **Table S2: VOC categories and corresponding kOH values (in units of  $10^{-12} \text{ cm}^3 \text{ molecule}^{-1} \text{ s}^{-1}$ ).**

| Potential Source | High reactivity (>median)                                                   | Low reactivity (<median)                                   |
|------------------|-----------------------------------------------------------------------------|------------------------------------------------------------|
| Primary/Biogenic | $\text{C}_9\text{H}_{12}$ – TMB (kOH = 32.5-56.7)                           |                                                            |
|                  | $\text{C}_{10}\text{H}_{16}$ – Monoterpene (kOH = 52.3-74.3)                | $\text{CH}_4\text{O}$ – Methanol (kOH = 0.94)              |
|                  | $\text{C}_8\text{H}_8$ – Styrene (kOH = 58.0)                               | $\text{C}_4\text{H}_8\text{O}$ – MEK (kOH = 1.22)          |
|                  | $\text{C}_5\text{H}_8$ – Isoprene (kOH = 100.0)                             | $\text{C}_7\text{H}_8$ – Toluene (kOH = 5.63)              |
|                  | $\text{C}_8\text{H}_{10}$ – Ethylbenzene (kOH = 7.0)/xylene (kOH=13.6-23.1) |                                                            |
| Secondary/Mixed  | $\text{C}_3\text{H}_4\text{O}$ – Acrolein (kOH = 29.0)                      | $\text{C}_3\text{H}_6\text{O}$ – Acetone (kOH = 0.17)      |
|                  |                                                                             | $\text{C}_2\text{H}_4\text{O}$ – Acetaldehyde (kOH = 15.0) |
|                  |                                                                             | $\text{CH}_2\text{O}$ – Formaldehyde (kOH = 9.37)          |

159

160

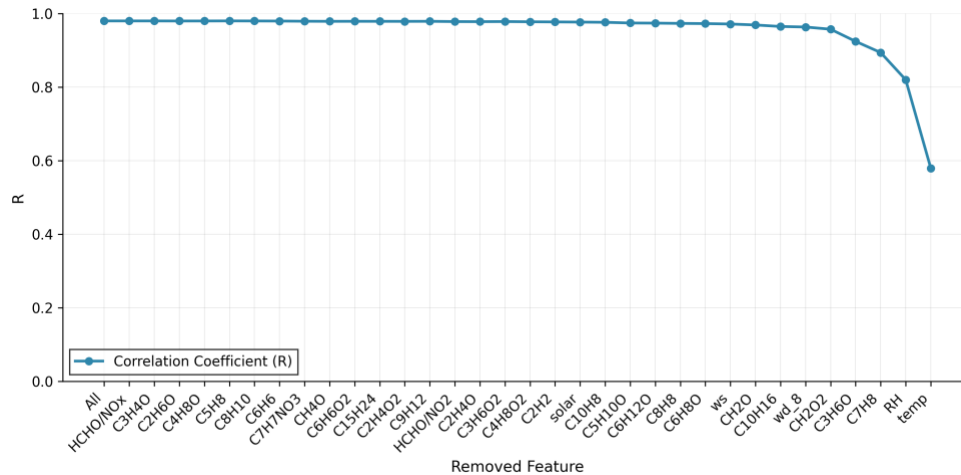

161

162 **Figure S6: Recursive Feature Elimination (RFE) results showing the change in model performance (R) as input**  
 163 **features are individually removed according to feature importance. The x-axis lists the features in the order of**  
 164 **their removal (from least important on the left to most important on the right).**

165

166

167 **Table S3: Model input and output variables for the conventional ML model**

| Data source | Input parameters                                                                                                                                                                                                                                                                                                                                                                                                                | Output               |
|-------------|---------------------------------------------------------------------------------------------------------------------------------------------------------------------------------------------------------------------------------------------------------------------------------------------------------------------------------------------------------------------------------------------------------------------------------|----------------------|
| KMA         | temperature (°C), WS (m/s), WD (°), RH (%)                                                                                                                                                                                                                                                                                                                                                                                      |                      |
| PTR-MS      | (VOCs unit in ppb)<br>Aromatic: C <sub>7</sub> H <sub>8</sub> , C <sub>8</sub> H <sub>8</sub> , C <sub>8</sub> H <sub>10</sub> , C <sub>9</sub> H <sub>12</sub><br>Biogenic: C <sub>5</sub> H <sub>8</sub> , C <sub>10</sub> H <sub>16</sub><br>OVOCs: CH <sub>2</sub> O, CH <sub>4</sub> O, C <sub>2</sub> H <sub>4</sub> O, C <sub>3</sub> H <sub>4</sub> O, C <sub>3</sub> H <sub>6</sub> O, C <sub>4</sub> H <sub>8</sub> O | O <sub>3</sub> (ppb) |
| Auxiliary   | HoD (h)                                                                                                                                                                                                                                                                                                                                                                                                                         |                      |

168

169 **Table S4: Model input and output variables for the process-informed ML model**

| Data source | Input parameters                                                                                                                                                                                                                                                                                                                                                                                                                                         | Output                                         |
|-------------|----------------------------------------------------------------------------------------------------------------------------------------------------------------------------------------------------------------------------------------------------------------------------------------------------------------------------------------------------------------------------------------------------------------------------------------------------------|------------------------------------------------|
| KMA         | temperature ( $\Delta^\circ\text{C}/\Delta t$ ), WS (m/s), WD (°), RH ( $\Delta\%/ \Delta t$ )                                                                                                                                                                                                                                                                                                                                                           |                                                |
| PTR-MS      | (VOCs unit in $\Delta\text{ppb}/\Delta t$ )<br>Aromatic: C <sub>7</sub> H <sub>8</sub> , C <sub>8</sub> H <sub>8</sub> , C <sub>8</sub> H <sub>10</sub> , C <sub>9</sub> H <sub>12</sub><br>Biogenic: C <sub>5</sub> H <sub>8</sub> , C <sub>10</sub> H <sub>16</sub><br>OVOCs: CH <sub>2</sub> O, CH <sub>4</sub> O, C <sub>2</sub> H <sub>4</sub> O, C <sub>3</sub> H <sub>4</sub> O, C <sub>3</sub> H <sub>6</sub> O, C <sub>4</sub> H <sub>8</sub> O | O <sub>3</sub> ( $\Delta\text{ppb}/\Delta t$ ) |
| Auxiliary   | HoD (h)                                                                                                                                                                                                                                                                                                                                                                                                                                                  |                                                |

170

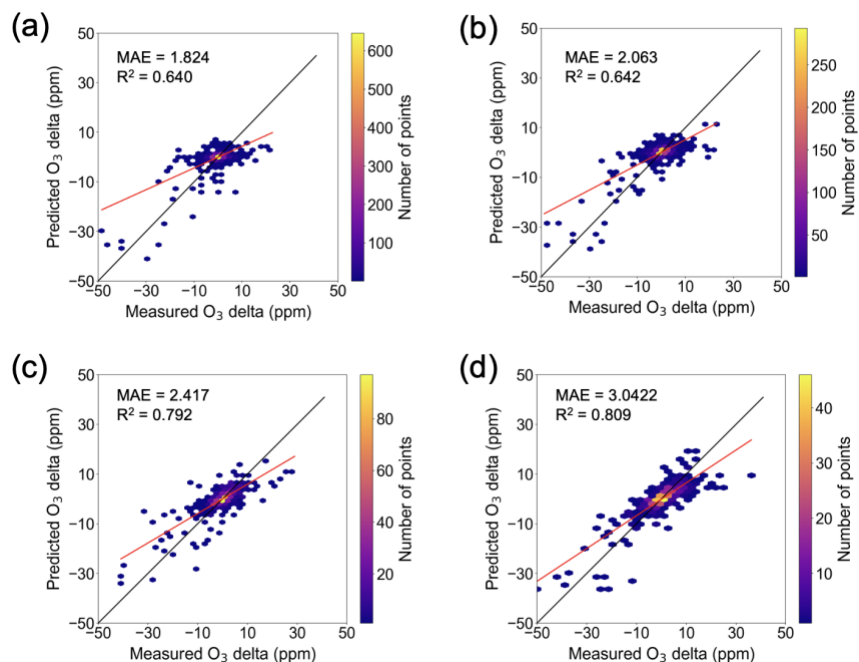

171  
 172 **Figure S7: Cross-validation performance of the model on held-out validation folds under different temporal**  
 173 **integration windows ( $\Delta t$ ): (a) 3 min; (b) 9 min; (c) 18 min; (d) 30 min.**

174

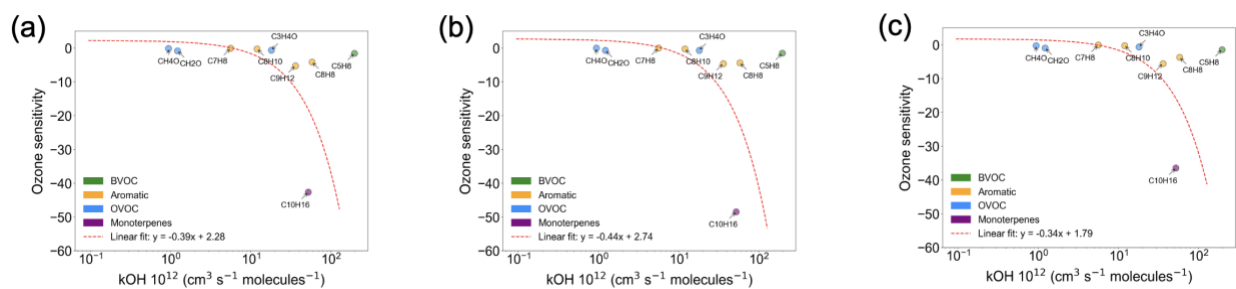

175  
 176 **Figure S8: Linear regression analysis of SHAP-derived response slope versus OH reaction rate constant KOH**  
 177 **for Aromatics and Monoterpenes. Red dashed curves represent the linear fit applied to the combined subset of**  
 178 **Aromatics and Monoterpenes ( $C_{10}H_{16}$ ). Panels (a–c) display the regression equations for overall, high ozone**  
 179 **(ozone > mean) and low ozone periods (ozone < mean). Isoprene was excluded from the linear fit because its**  
 180 **daytime emissions mask its net chemical consumption ( $\Delta VO_C$ ), introducing variance that complicates the**  
 181 **extraction of a simple linear response slope.**

182

183

184

185

186

187

188 **References**

- 189 Atkinson, R. and Arey, J.: Atmospheric Degradation of Volatile Organic Compounds, *Chem. Rev.*, 103, 4605–4638,  
190 <https://doi.org/10.1021/cr0206420>, 2003.
- 191 Borbon, A., Gilman, J. B., Kuster, W. C., Grand, N., Chevallier, S., Colomb, A., Dolgorouky, C., Gros, V., Lopez, M.,  
192 Sarda-Esteve, R., Holloway, J., Stutz, J., Petetin, H., McKeen, S., Beekmann, M., Warneke, C., Parrish, D. D., and de  
193 Gouw, J. A.: Emission ratios of anthropogenic volatile organic compounds in northern mid-latitude megacities:  
194 Observations versus emission inventories in Los Angeles and Paris, *J. Geophys. Res. Atmospheres*, 118, 2041–2057,  
195 <https://doi.org/10.1002/jgrd.50059>, 2013.
- 196 Carter, W. P. L.: Updated maximum incremental reactivity scale and hydrocarbon bin reactivities for regulatory  
197 applications, *Calif. Air Resour. Board Contract*, 339, 2009.
- 198 Gu, C., Wang, S., Zhu, J., Wu, S., Duan, Y., Gao, S., and Zhou, B.: Investigation on the urban ambient isoprene and  
199 its oxidation processes, *Atmos. Environ.*, 270, 118870, <https://doi.org/10.1016/j.atmosenv.2021.118870>, 2022.
- 200 Guyon, I., Weston, J., Barnhill, S., and Vapnik, V.: Gene Selection for Cancer Classification using Support Vector  
201 Machines, *Mach. Learn.*, 46, 389–422, <https://doi.org/10.1023/A:1012487302797>, 2002.
- 202 Hayes, P. L., Ortega, A. M., Cubison, M. J., Froyd, K. D., Zhao, Y., Cliff, S. S., Hu, W. W., Toohey, D. W., Flynn, J.  
203 H., Lefer, B. L., Grossberg, N., Alvarez, S., Rappenglück, B., Taylor, J. W., Allan, J. D., Holloway, J. S., Gilman, J.  
204 B., Kuster, W. C., de Gouw, J. A., Massoli, P., Zhang, X., Liu, J., Weber, R. J., Corrigan, A. L., Russell, L. M., Isaacman,  
205 G., Worton, D. R., Kreisberg, N. M., Goldstein, A. H., Thalman, R., Waxman, E. M., Volkamer, R., Lin, Y. H., Surratt,  
206 J. D., Kleindienst, T. E., Offenberg, J. H., Dusanter, S., Griffith, S., Stevens, P. S., Brioude, J., Angevine, W. M., and  
207 Jimenez, J. L.: Organic aerosol composition and sources in Pasadena, California, during the 2010 CalNex campaign,  
208 *J. Geophys. Res. Atmospheres*, 118, 9233–9257, <https://doi.org/10.1002/jgrd.50530>, 2013.
- 209 Lundberg, S. M., Erion, G., Chen, H., DeGrave, A., Prutkin, J. M., Nair, B., Katz, R., Himmelfarb, J., Bansal, N., and  
210 Lee, S.-I.: From local explanations to global understanding with explainable AI for trees, *Nat. Mach. Intell.*, 2, 56–67,  
211 <https://doi.org/10.1038/s42256-019-0138-9>, 2020.
- 212 Simpson, I. J., Blake, D. R., Blake, N. J., Meinardi, S., Barletta, B., Hughes, S. C., Fleming, L. T., Crawford, J. H.,  
213 Diskin, G. S., Emmons, L. K., Fried, A., Guo, H., Peterson, D. A., Wisthaler, A., Woo, J.-H., Barré, J., Gaubert, B.,  
214 Kim, J., Kim, M. J., Kim, Y., Knote, C., Mikoviny, T., Pusede, S. E., Schroeder, J. R., Wang, Y., Wennberg, P. O., and  
215 Zeng, L.: Characterization, sources and reactivity of volatile organic compounds (VOCs) in Seoul and surrounding  
216 regions during KORUS-AQ, *Elem. Sci. Anthr.*, 8, 37, <https://doi.org/10.1525/elementa.434>, 2020.
- 217 Sinha, V., Williams, J., Diesch, J. M., Drewnick, F., Martinez, M., Harder, H., Regelin, E., Kubistin, D., Bozem, H.,  
218 Hosaynali-Beygi, Z., Fischer, H., Andrés-Hernández, M. D., Kartal, D., Adame, J. A., and Lelieveld, J.: Constraints  
219 on instantaneous ozone production rates and regimes during DOMINO derived using in-situ OH reactivity  
220 measurements, *Atmospheric Chem. Phys.*, 12, 7269–7283, <https://doi.org/10.5194/acp-12-7269-2012>, 2012.
- 221 Sommariva, R., Cox, S., Martin, C., Borońska, K., Young, J., Jimack, P. K., Pilling, M. J., Matthaios, V. N., Nelson,  
222 B. S., Newland, M. J., Panagi, M., Bloss, W. J., Monks, P. S., and Rickard, A. R.: AtChem (version 1), an open-source  
223 box model for the Master Chemical Mechanism, *Geosci. Model Dev.*, 13, 169–183, [https://doi.org/10.5194/gmd-13-](https://doi.org/10.5194/gmd-13-169-2020)  
224 169-2020, 2020.
- 225 Wang, M., Lu, Y., Ji, W., Chai, W., Wang, H., Ding, F., Zhao, X., Qin, M., Zhang, Y., Ge, X., and Shao, M.: Maximum  
226 incremental reactivity for volatile organic compounds in three city clusters of China: quantification, variability, and  
227 implications for ozone control, *Atmos. Environ.*, 361, 121459, <https://doi.org/10.1016/j.atmosenv.2025.121459>, 2025.
- 228 Zhu, J., Wang, S., Gu, C., Jiang, Z., Zhang, S., Xue, R., Yan, Y., and Zhou, B.: Why did ozone concentrations remain  
229 high during Shanghai's static management? A statistical and radical-chemistry perspective, *Atmospheric Chem. Phys.*,  
230 24, 8383–8395, <https://doi.org/10.5194/acp-24-8383-2024>, 2024.
